# Supplementary material
Source: Springer Nature journal article supplement (https://www.springermedizin.de/resource/supplementary/12958_2008_455_MOESM2_ESM.pdf/9567930)

PBX1

PBX2

MEIS1/2

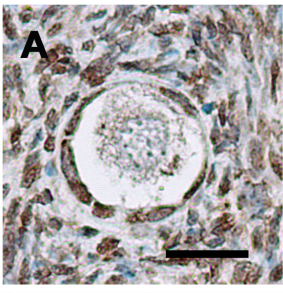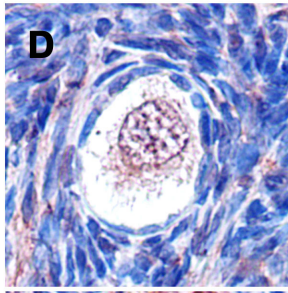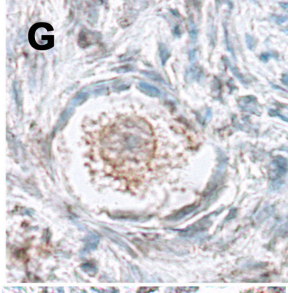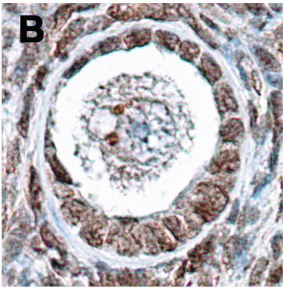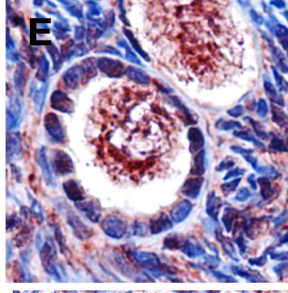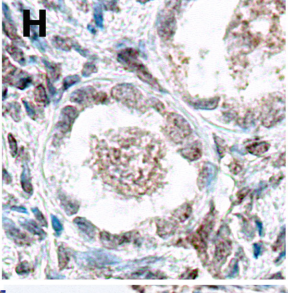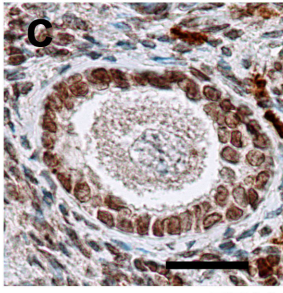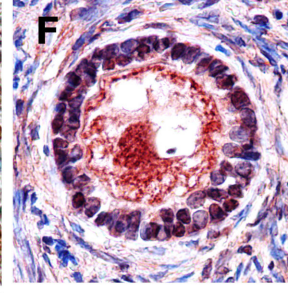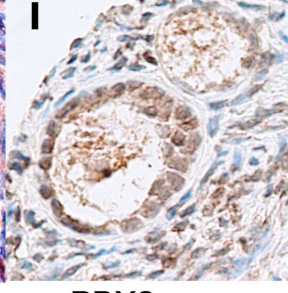

PBX1

PBX2

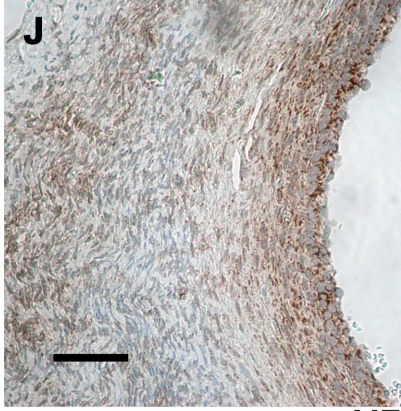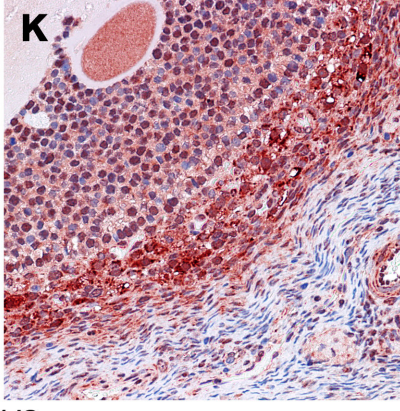

MEIS1/2

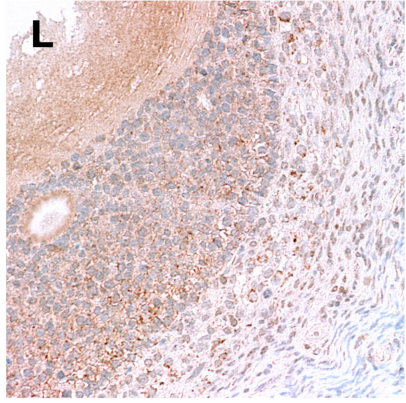

Supplement: MOESM2 [file 9567930]
